# Supplementary material for: Supraglacial streamflow and meteorological drivers from southwest Greenland
Source: Copernicus journal article supplement (doi:10.5194/tc-16-2245-2022), 2022-06-14
Supplement: Supplementary file 1 [file tc-16-2245-2022-supplement.pdf]

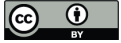

*Supplement of*

## **Supraglacial streamflow and meteorological drivers from southwest Greenland**

**Rohi Muthyala et al.**

*Correspondence to:* Rohi Muthyala (rohi.muthyala.91@gmail.com)

The copyright of individual parts of the supplement might differ from the article licence.

Supplementary Figures:

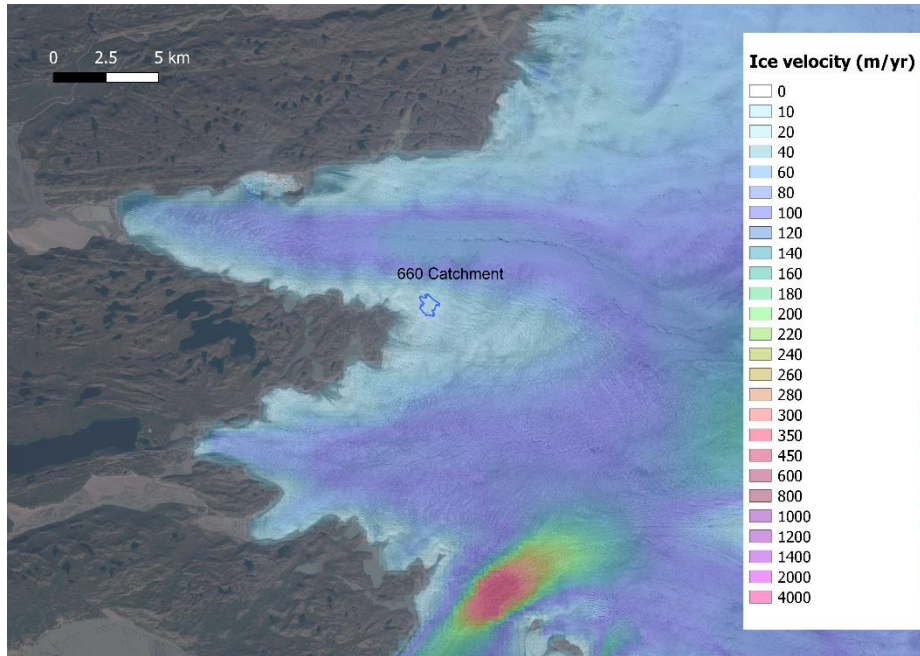

Figure S1: Annual average ice velocity in 2016. Velocity data generated using auto-RIFT (Gardner et al., 2018) and provided by the NASA MEASUREs ITS\_LIVE project (Gardner et al., 2019).

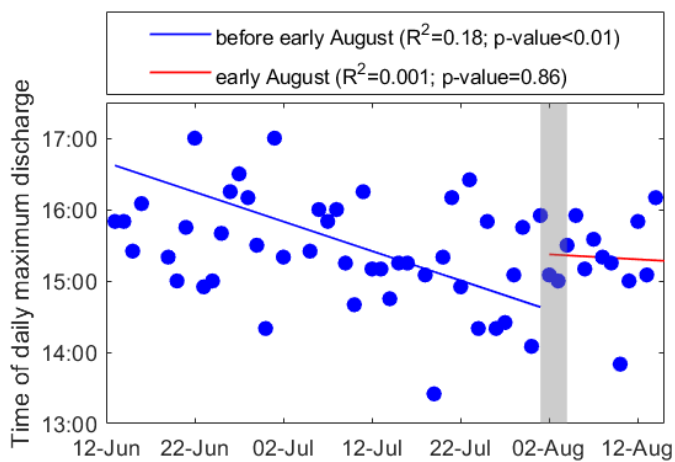

Figure S2: Time to daily maximum discharge for the entire study period including clear sky and cloudy days. Best fit curves are plotted for time of daily maximum discharge before (blue) and after (red) early August, coinciding with a sudden drop in temperature and water stored in the weathering crust.

## References

Gardner, A. S., Moholdt, G., Scambos, T., Fahnestock, M., Ligtenberg, S., Van Den Broeke, M. and Nilsson, J.: Increased West Antarctic and unchanged East Antarctic ice discharge over the last 7 years, *Cryosphere*, 12(2), 521–547, doi:10.5194/tc-12-521-2018, 2018.

Gardner AS, Fahnestock MA, Scambos TA. ITS\_LIVE regional glacier and ice sheet surface velocities. Data archived at National Snow and Ice Data Center, <https://its-live.jpl.nasa.gov/> (last access: 12/05/2022), 2019.
